# Supplementary figures and images for: Single particle inductively coupled plasma mass spectrometry with nanosecond time resolution
Source: Royal Society of Chemistry journal article supplement (doi:10.1039/d3ja00373f), 2023-12-05

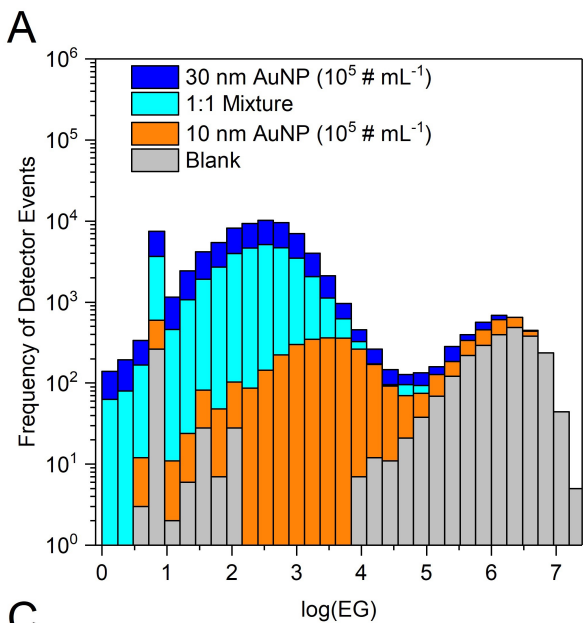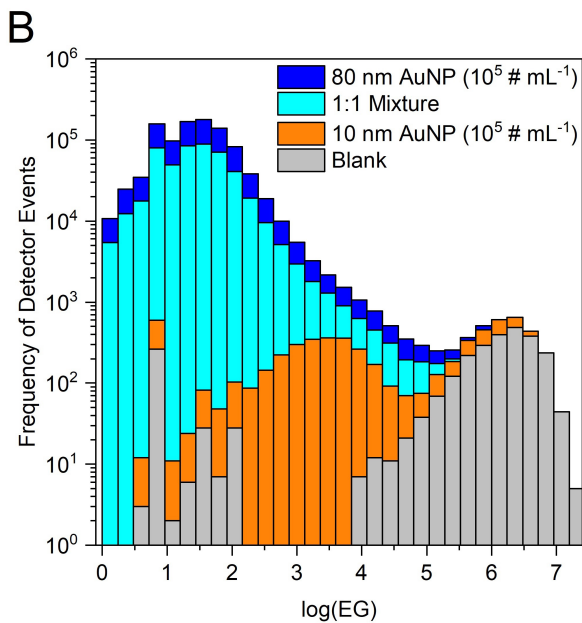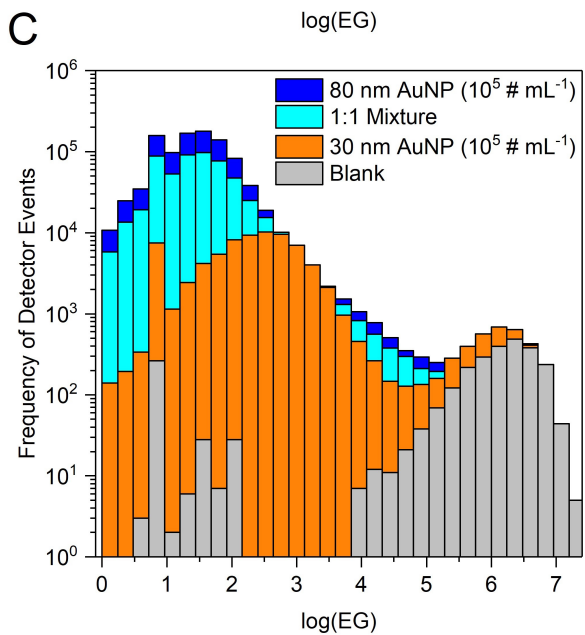

Supplement: d3ja00373f3.pdf [file d3ja00373f3.pdf]
